# Supplementary material for: Achillea millefolium L. and Achillea biebersteinii Afan. Hydroglycolic Extracts–Bioactive Ingredients for Cosmetic Use
Source: PubMed Central journal article supplement (PMC7436264; doi:10.3390/molecules25153368), 2020-07-24
Supplement: molecules-25-03368-s001.pdf [file molecules-25-03368-s001.pdf]

1 Supplementary Materials for the Article

2 ***Achillea millefolium* L. and *Achillea biebersteinii***  
3 **Afan. Hydroglycolic Extracts–Bioactive Ingredients**  
4 **for Cosmetic Use**

5 **Katarzyna Gawel-Bęben <sup>1,\*</sup>, Marcelina Strzepak-Gomółka <sup>1</sup>, Marcin Czop <sup>2</sup>, Zuriyadda Sakipova**  
6 **<sup>3</sup>, Kazimierz Głowniak <sup>1</sup> and Wirginia Kukula-Koch <sup>4</sup>**

7 <sup>1</sup> Department of Cosmetology, University of Information Technology and Management in Rzeszów,  
8 Sucharskiego 2, 35-225 Rzeszów, Poland; mstrzepak@wsiz.rzeszow.pl (M.S.-G.);  
9 kglowniak@wsiz.rzeszow.pl (K.G.)

10 <sup>2</sup> Department of Clinical Genetics, Medical University of Lublin, Radziwiłłowska 11, 20-080 Lublin, Poland;  
11 marcin.czop@umLub.pl

12 <sup>3</sup> School of Pharmacy, Kazakh National Medical University named after S.D. Asfendiyarov (KazNMU), 88  
13 Tole bi street, 050012 Almaty, Kazakhstan; sakipova.z@kaznmu.kz

14 <sup>4</sup> Department of Pharmacognosy, Medical University of Lublin, Chodźki 1, 20-093 Lublin, Poland;  
15 virginia.kukula@gmail.com

16 \* Correspondence: kagawel@wsiz.rzeszow.pl; Tel.: +48-17-866-1412

17 Academic Editor: Halina Ekiert and Agnieszka Szopa

18 Received: 30 June 2020; Accepted: 21 July 2020; Published: date

19

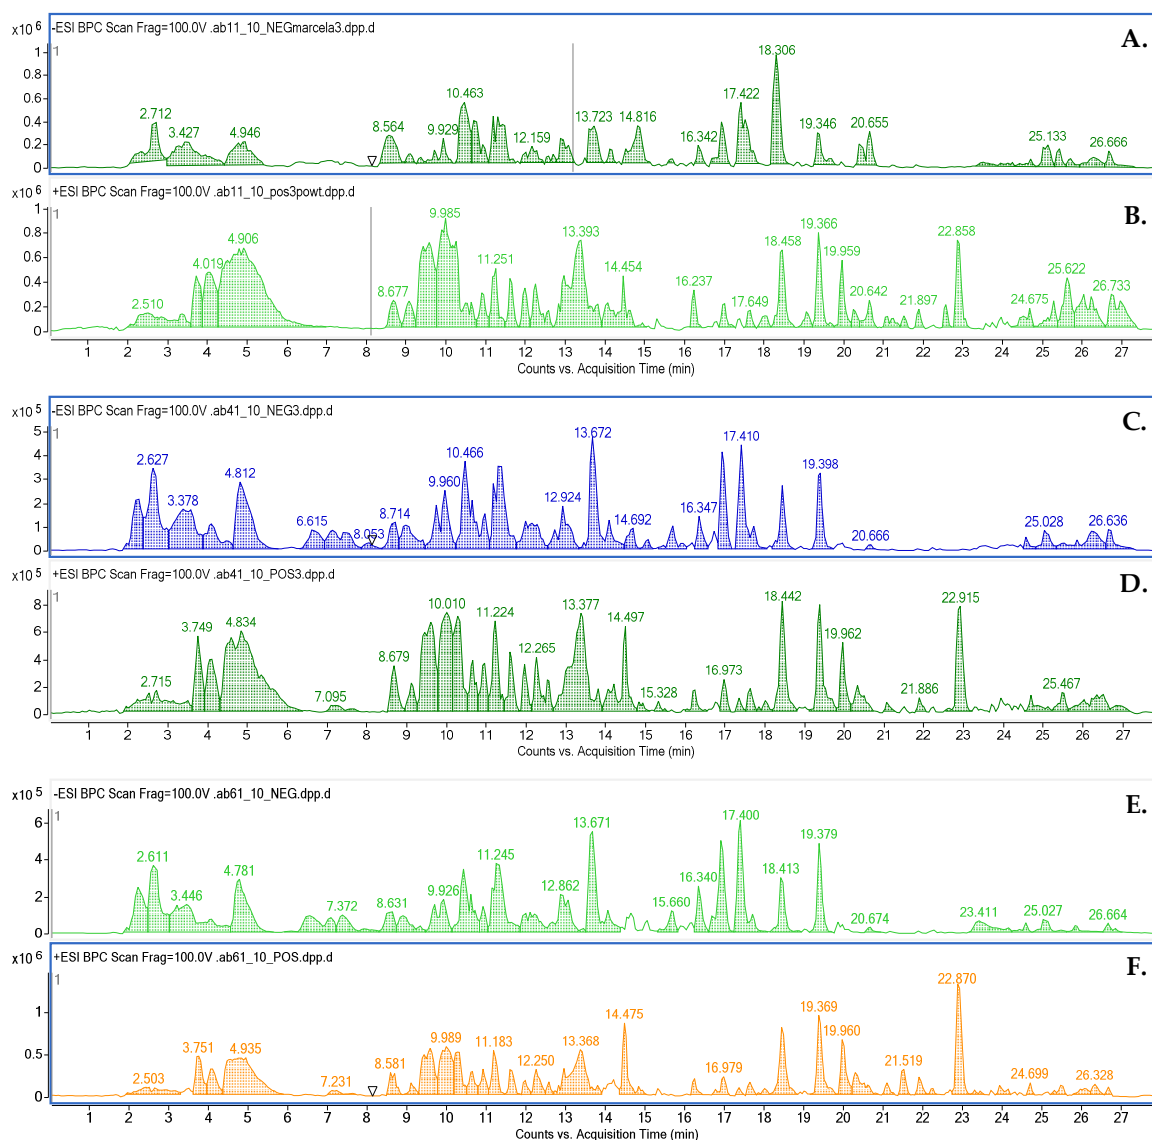

20

21 **Figure S1.** The TIC chromatogram recorded in the negative (A, C, E) and positive (B, D, F) ionization  
 22 modes for the *A. biebersteinii* hydro-glycolic extract: HG 1:1 (A, B), HG 4:1 (C, D) and HG 6:1 (E, F).

23

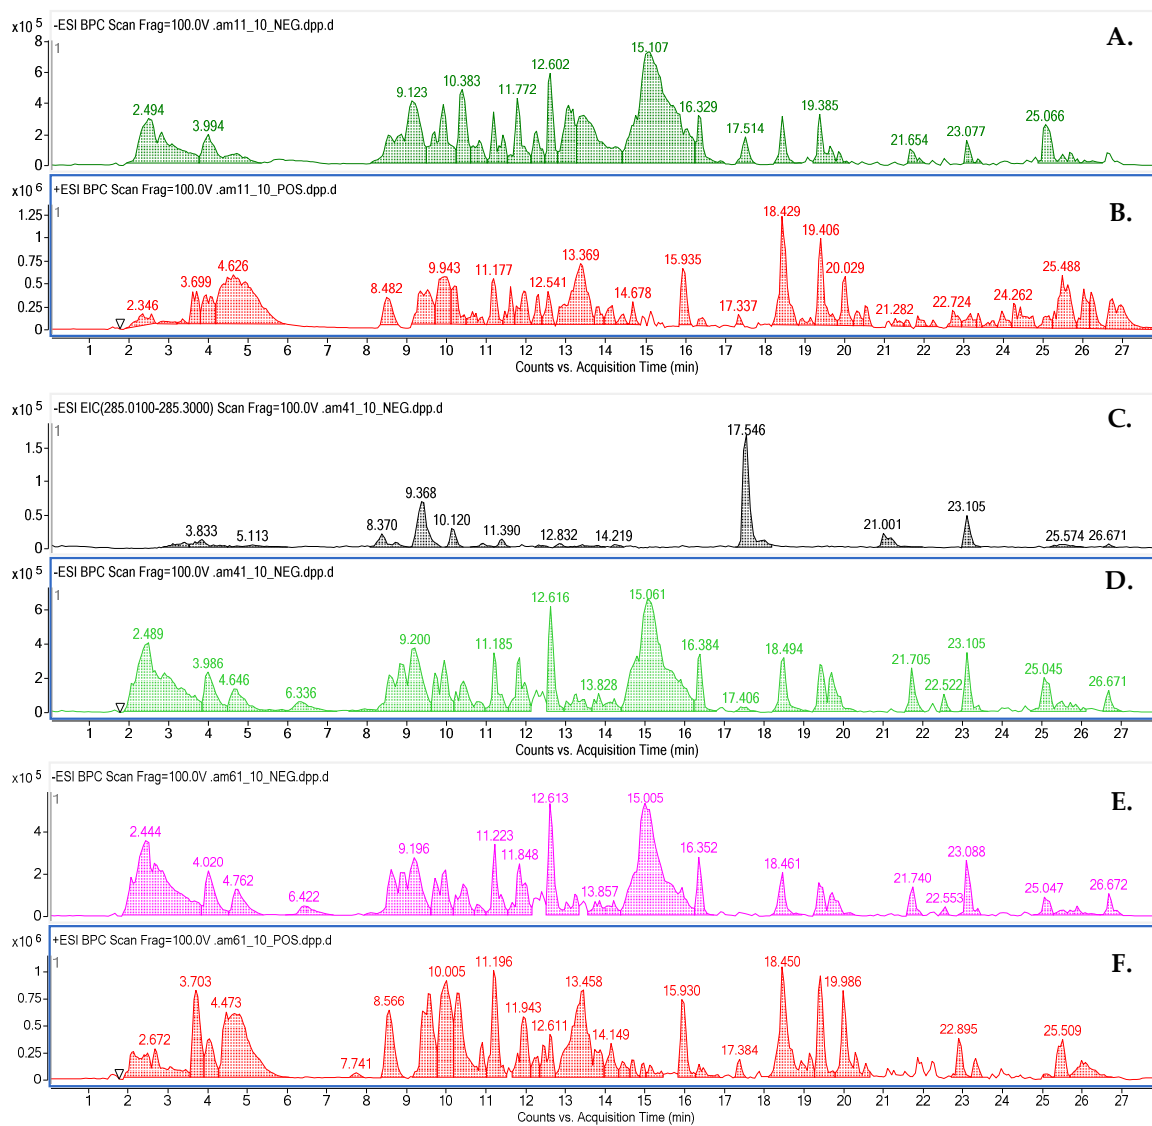

24

25 **Figure S2.** The TIC chromatogram recorded in the negative (A, C, E) and positive (B, D, F) ionization  
26 modes for the *A. millefolium* hydro-glycolic extract: HG 1:1 (A, B), HG 4:1 (C, D) and HG 6:1 (E, F).

27

28

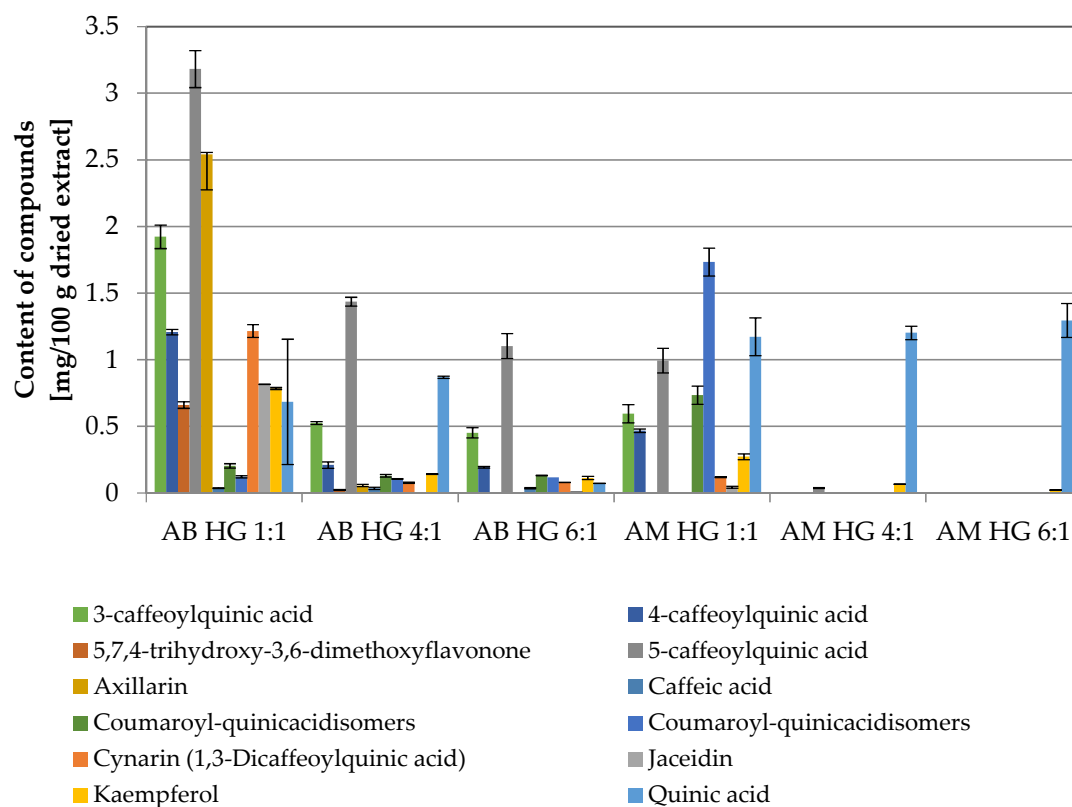

29

30 **Figure S3.** The quantitative composition of the studied extracts; values of graph represent mean  $\pm$ SD;  
 31 AM—*Achillea millefolium*, AB—*Achillea biebersteinii*, HG—hydroglycolic extract

32
